# Supplementary material for: Prediction of Liver Steatosis and Fibrosis Based on Clinical Variables Using a Large National Survey Database
Source: Hindawi journal article supplement (doi:10.1155/2023/1791500), 2023-05-24

Figure 5S: Decision trees in predicting liver steatosis using 294 dB/m as cutoff. The following predictors were used in the regression trees: age, gender, body mass index, hemoglobin A1c, triglyceride level, serum LDL, weekly metabolic energy expenditure, history of smoking, systolic and diastolic blood pressure

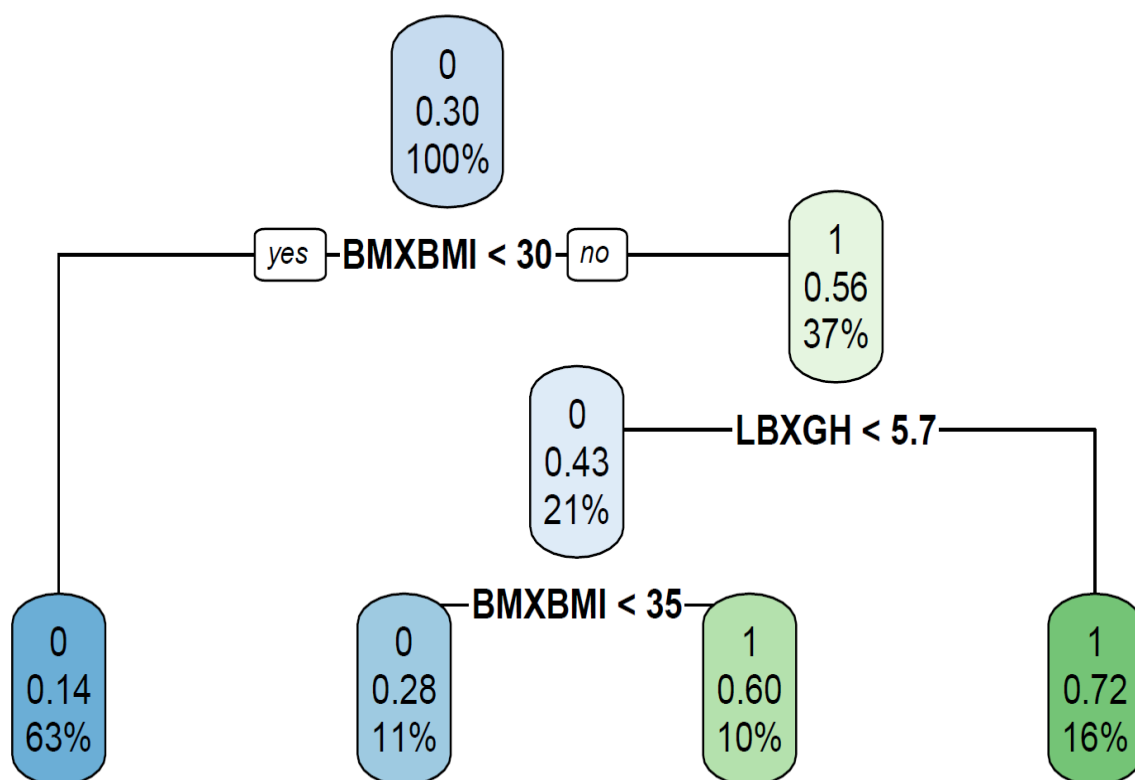

Supplement: f1 [file 1791500.f1.zip]
