# Supplementary material for: Prediction of Liver Steatosis and Fibrosis Based on Clinical Variables Using a Large National Survey Database
Source: Hindawi journal article supplement (doi:10.1155/2023/1791500), 2023-05-24
Supplement: f1 [file 1791500.f1.zip]

Table 1S: Result of univariable linear regression analysis with CAP as an outcome and sleeping variable as a predictor using a spline term at 6 hours sleep

|                      | Estimate | St. Error | t value | Pr(> t ) |
|----------------------|----------|-----------|---------|----------|
| (Intercept)          | 248.0928 | 12.337    | 20.111  | <0.01    |
| Sleep                | 3.749    | 2.369     | 1.582   | 0.1396   |
| Sleep-spline1        | -15.253  | 5.901     | -2.59   | 0.024*   |
| Sleep: sleep-spline1 | 0.7140   | 0.431     | 1.66    | 0.123    |
