# Supplementary material for: Prediction of Liver Steatosis and Fibrosis Based on Clinical Variables Using a Large National Survey Database
Source: Hindawi journal article supplement (doi:10.1155/2023/1791500), 2023-05-24
Supplement: f1 [file 1791500.f1.zip]

Table 8S: Adjusted comparisons between people more than the age of 50 and those equal or less than 50 years-old in different variables (Liver stiffness, liver steatosis, serum triglyceride values, hemoglobin A1c, serum LDL, weekly metabolic energy expenditure (METs), platelet counts, systolic and diastolic blood pressure)

| Covariate                  | Age>50(mean, CI)           | Age<=50 (mean, CI)        | P-value |
|----------------------------|----------------------------|---------------------------|---------|
| Liver stiffness values     | 6Kpa (5.7-6.3)             | 5.48Kpa (5.15-5.8)        | 0.16    |
| Liver steatosis (mean)(SE) | 277dB/m (271-283)          | 253dB/m (249-258)         | 0.13    |
| Triglyceride               | 113mg/dL (105-121)         | 99mg/dL (94-105)          | 0.73    |
| Hemoglobin A1c             | 5.9% (5.8-6)               | 5.38% (5.445-5.3)         | <0.01   |
| LDL                        | 114 mg/dL (109-119)        | 108mg/dL (105-111)        | 0.14    |
| METs                       | 3456 Kcal/week (2927-3985) | 6339Kcal/week (5610-7068) | <0.01   |
| Platelet                   | 232 (223-242)              | 245 (239-251)             | 0.04    |
| Systolic blood pressure    | 131 mmHg (129-133)         | 116 mmHg (115-117)        | <0.01   |
| Diastolic blood pressure   | 73 mmHg (72-74)            | 72 mmHg (71-73)           | <0.01   |
