# Supplementary material for: Prediction of Liver Steatosis and Fibrosis Based on Clinical Variables Using a Large National Survey Database
Source: Hindawi journal article supplement (doi:10.1155/2023/1791500), 2023-05-24

Figure 4S illustrates the Receiver Operator Curve (ROC) of two logistic regression models using two different cutoffs for liver steatosis on CAP (294 dB/m VS 245dB/m) using the same predictors on two models; age, gender, body mass index, serum triglyceride level, hemoglobin A1c, alcohol consumption and metabolic energy expenditure per week. The area under the curve was higher for the model with a cutoff value 294dB/m VS 245dB/m (0.8335 VS 0.798). ROC curves were created using Weighted ROC package to account for the weights in the survey design. TPR=True positive rate, FPR=False positive rate.

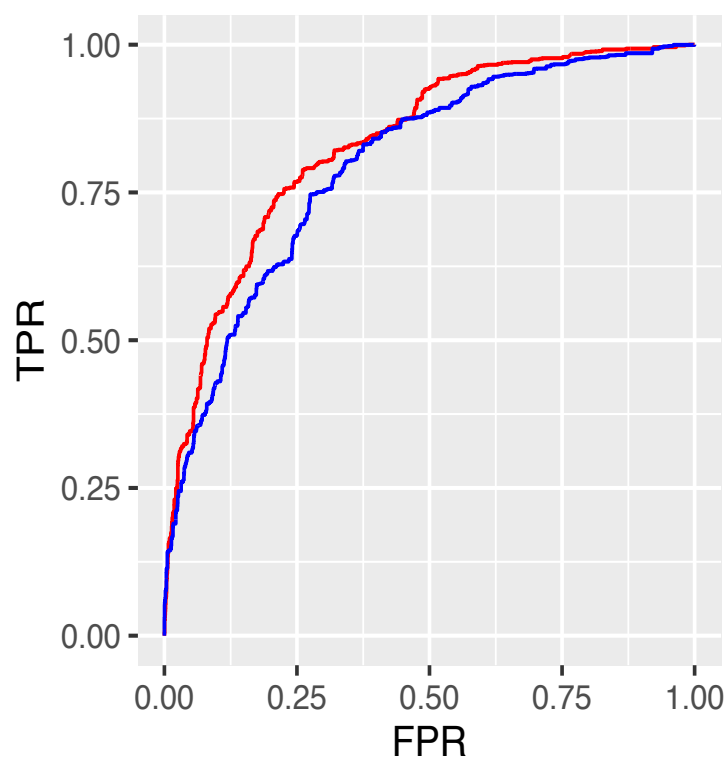

Supplement: f1 [file 1791500.f1.zip]
