# Supplementary material for: Prediction of Liver Steatosis and Fibrosis Based on Clinical Variables Using a Large National Survey Database
Source: Hindawi journal article supplement (doi:10.1155/2023/1791500), 2023-05-24

Figure 3S: Reduction in the Bayesian Information Criteria (BIC) using the subset variable selection method. Lowest value for the BIC was achieved by adding the following predictors: Body mass index, serum triglyceride level, age, sex, HbA1c and diastolic blood pressure. On the other hand, adding systolic blood pressure, alcohol consumption, smoking, metabolic energy expenditure and serum LDL level results in increasing the value for the BIC. Result was similar using forward selection method.

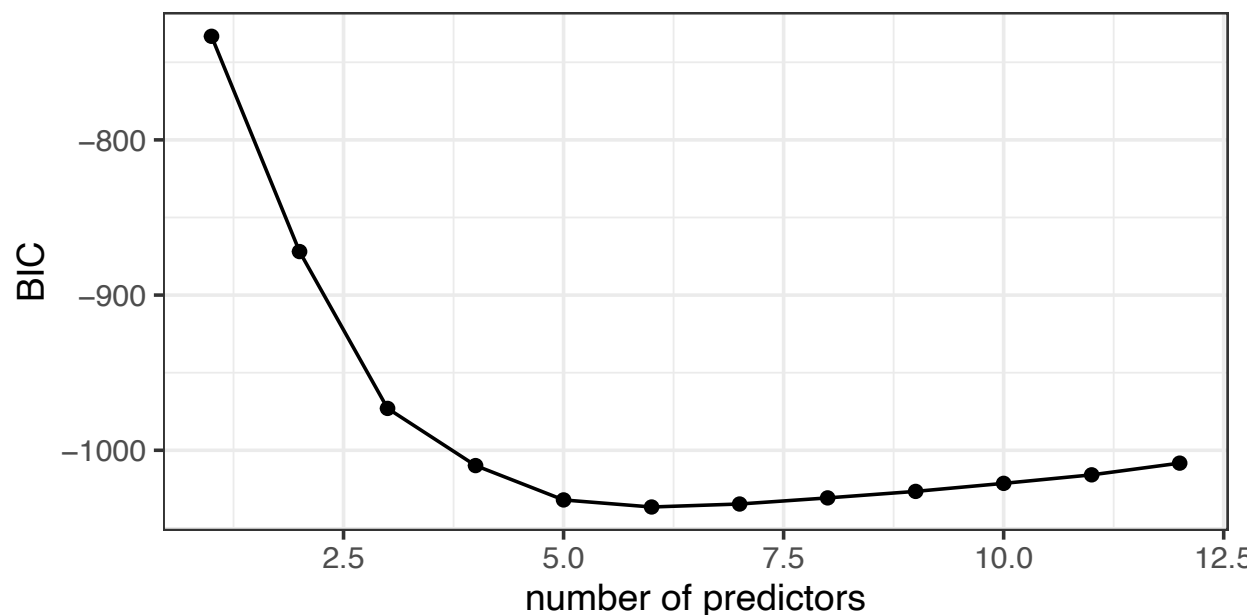

Supplement: f1 [file 1791500.f1.zip]
