# Supplementary material for: Prediction of Liver Steatosis and Fibrosis Based on Clinical Variables Using a Large National Survey Database
Source: Hindawi journal article supplement (doi:10.1155/2023/1791500), 2023-05-24

Figure7S: Illustrates the relative influence of the following variables (in descending order) on liver stiffness using the gradient boosted model (gbm). BMI, platelet counts, hemoglobin A1c, diastolic blood pressure, AST:ALT ratio, age, serum triglyceride level, systolic blood pressure, LDL, Alcohol consumption, metabolic energy expenditure, smoking and sex. The model was created using interaction. Depth of 6, shrinkage parameter of 0.001 and 3000 trees.

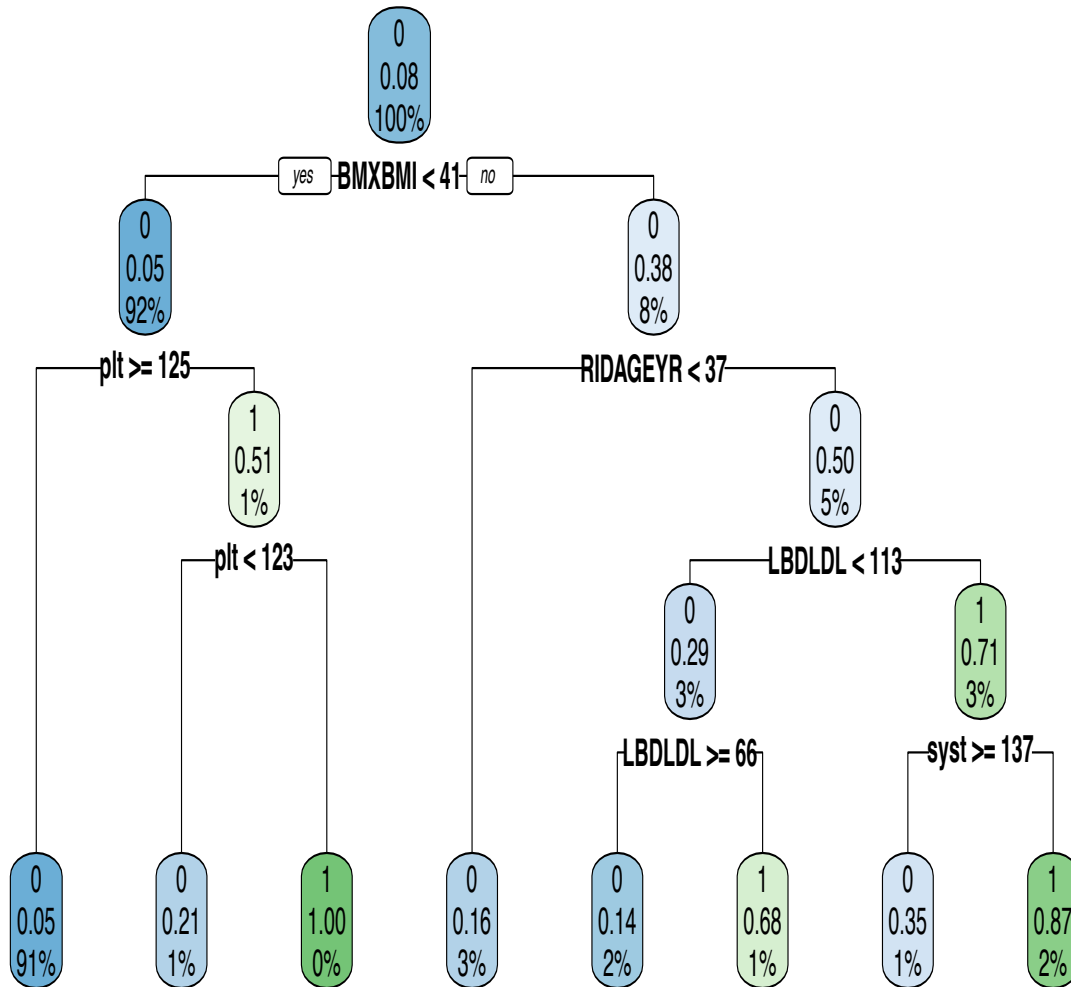

Supplement: f1 [file 1791500.f1.zip]
