# Supplementary material for: Prediction of Liver Steatosis and Fibrosis Based on Clinical Variables Using a Large National Survey Database
Source: Hindawi journal article supplement (doi:10.1155/2023/1791500), 2023-05-24

Figure 6S: Decision tree using liver fibrosis (stiffness) at 8.2 Kpa as an outcome, with body mass index, age, gender, hemoglobin A1c, platelet count, AST/ALT ratio, smoking, weekly metabolic energy expenditure, serum triglyceride and LDL level as predictors.

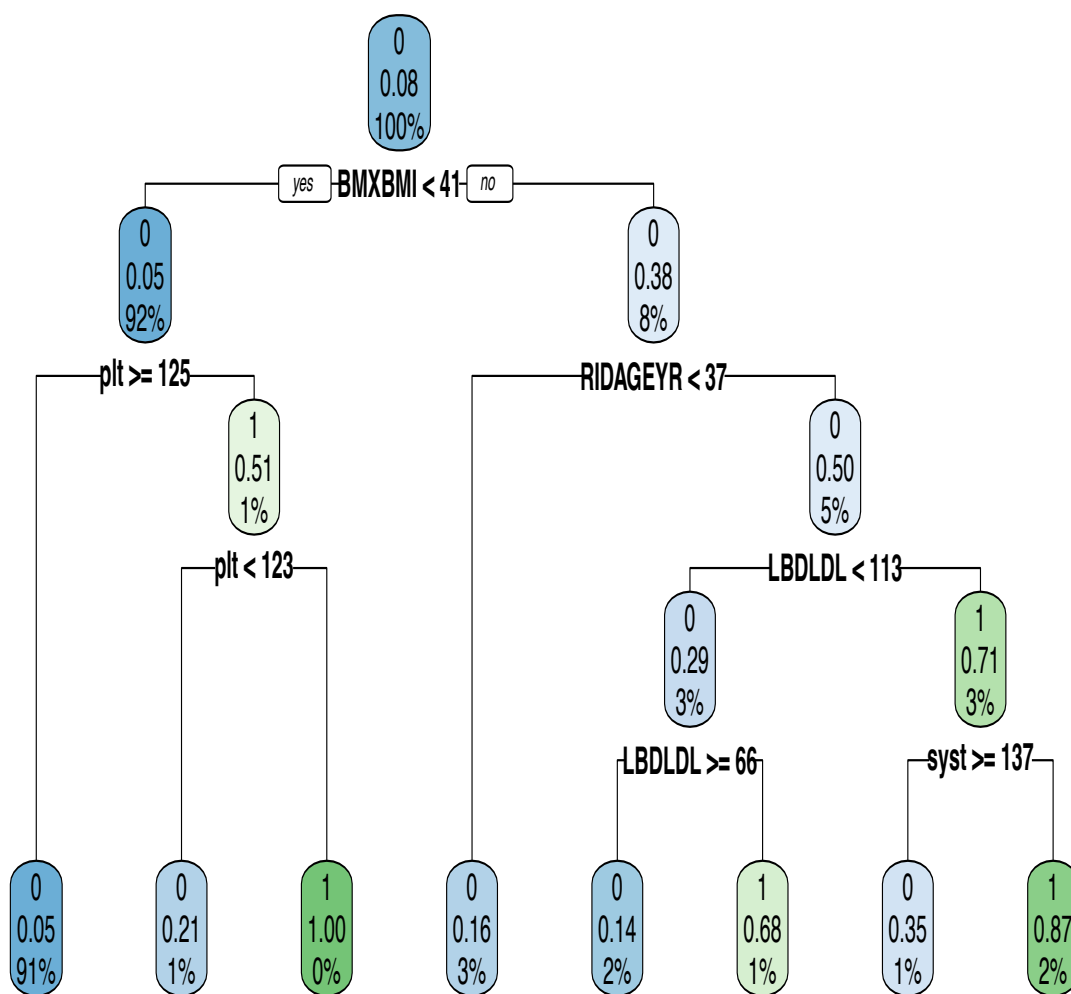

Supplement: f1 [file 1791500.f1.zip]
