# Supplementary material for: Prediction of Liver Steatosis and Fibrosis Based on Clinical Variables Using a Large National Survey Database
Source: Hindawi journal article supplement (doi:10.1155/2023/1791500), 2023-05-24
Supplement: f1 [file 1791500.f1.zip]

Table 6S: result of multivariable linear regression model using liver steatosis as an outcome and the following covariates: LDL, Triglyceride level, Age, Sex, Hemoglobin A1c, Body mass index, Alcohol consumption, average number of cigarettes smoked per day for the last month, Systolic and diastolic blood pressure, excluding the metabolic energy expenditure (MET). R2 for the model is 0.81

|                                                                                                                                                                                                                                                                                                                                                                                                                                                                                                                                                                                                                                          | Estimate | Std. Error | t value | Pr(> t ) |
|------------------------------------------------------------------------------------------------------------------------------------------------------------------------------------------------------------------------------------------------------------------------------------------------------------------------------------------------------------------------------------------------------------------------------------------------------------------------------------------------------------------------------------------------------------------------------------------------------------------------------------------|----------|------------|---------|----------|
| (Intercept)                                                                                                                                                                                                                                                                                                                                                                                                                                                                                                                                                                                                                              | 72       | 11.7       | 6.17    | 0.0016   |
| LDL*                                                                                                                                                                                                                                                                                                                                                                                                                                                                                                                                                                                                                                     | -0.02    | 0.8        | -0.024  | 0.98     |
| Triglyceride*                                                                                                                                                                                                                                                                                                                                                                                                                                                                                                                                                                                                                            | 3        | 0.42       | 7.2     | 0.0008   |
| Age**                                                                                                                                                                                                                                                                                                                                                                                                                                                                                                                                                                                                                                    | 5.6      | 0.94       | 6       | 0.00184  |
| Sex                                                                                                                                                                                                                                                                                                                                                                                                                                                                                                                                                                                                                                      | -12.05   | 3.6        | -3.352  | 0.02     |
| Hemoglobin A1c                                                                                                                                                                                                                                                                                                                                                                                                                                                                                                                                                                                                                           | 8.1      | 2.1        | 3.93    | 0.011    |
| Body mass index                                                                                                                                                                                                                                                                                                                                                                                                                                                                                                                                                                                                                          | 4.34     | 0.25       | 17.66   | 0.0001   |
| Alcohol consumption****                                                                                                                                                                                                                                                                                                                                                                                                                                                                                                                                                                                                                  | -0.863   | 0.527      | -1.51   | 0.40     |
| Smoking                                                                                                                                                                                                                                                                                                                                                                                                                                                                                                                                                                                                                                  | 0.26     | 0.28       | 0.92    | 0.4      |
| Systolic blood pressure                                                                                                                                                                                                                                                                                                                                                                                                                                                                                                                                                                                                                  | 1.38     | 1.24       | 1.12    | 0.32     |
| Diastolic blood pressure                                                                                                                                                                                                                                                                                                                                                                                                                                                                                                                                                                                                                 | 2.3      | 1.15       | 2.1     | 0.093    |
| <p>*Values are divided by 20. Therefore, the estimated value reflects each 20-unit increase in the predictor value. ** Values are divided by 10. Therefore, the estimate reflects each 10-unit increase in the predictor value. **** Alcohol consumption: 1: drinks alcohol daily, 2: drinks alcohol almost daily, 3: drinks alcohol 3-4 times a week, 4: drinks alcohol 2 times a week. 5: drinks alcohol once a week. 6: drinks alcohol 2-3 times a month. 7: drinks alcohol once a month. 8: drinks alcohol 7-11 times a year. 9: drinks alcohol 3-6 times a year. 10: drinks alcohol 1-2 times a year. 11: doesn't drink alcohol</p> |          |            |         |          |
