# Supplementary material for: Prediction of Liver Steatosis and Fibrosis Based on Clinical Variables Using a Large National Survey Database
Source: Hindawi journal article supplement (doi:10.1155/2023/1791500), 2023-05-24

Figure 2S: The correlation matrix between the following covariates: LUXCAPM=liver steatosis. LBXTR=Triglyceride level. LBDLDL=LDL level. BMXBMI=Body mass index. LUXSMED=liver stiffness KPa. LBHD=serum HDL. BMXWAIST=waist circumference.

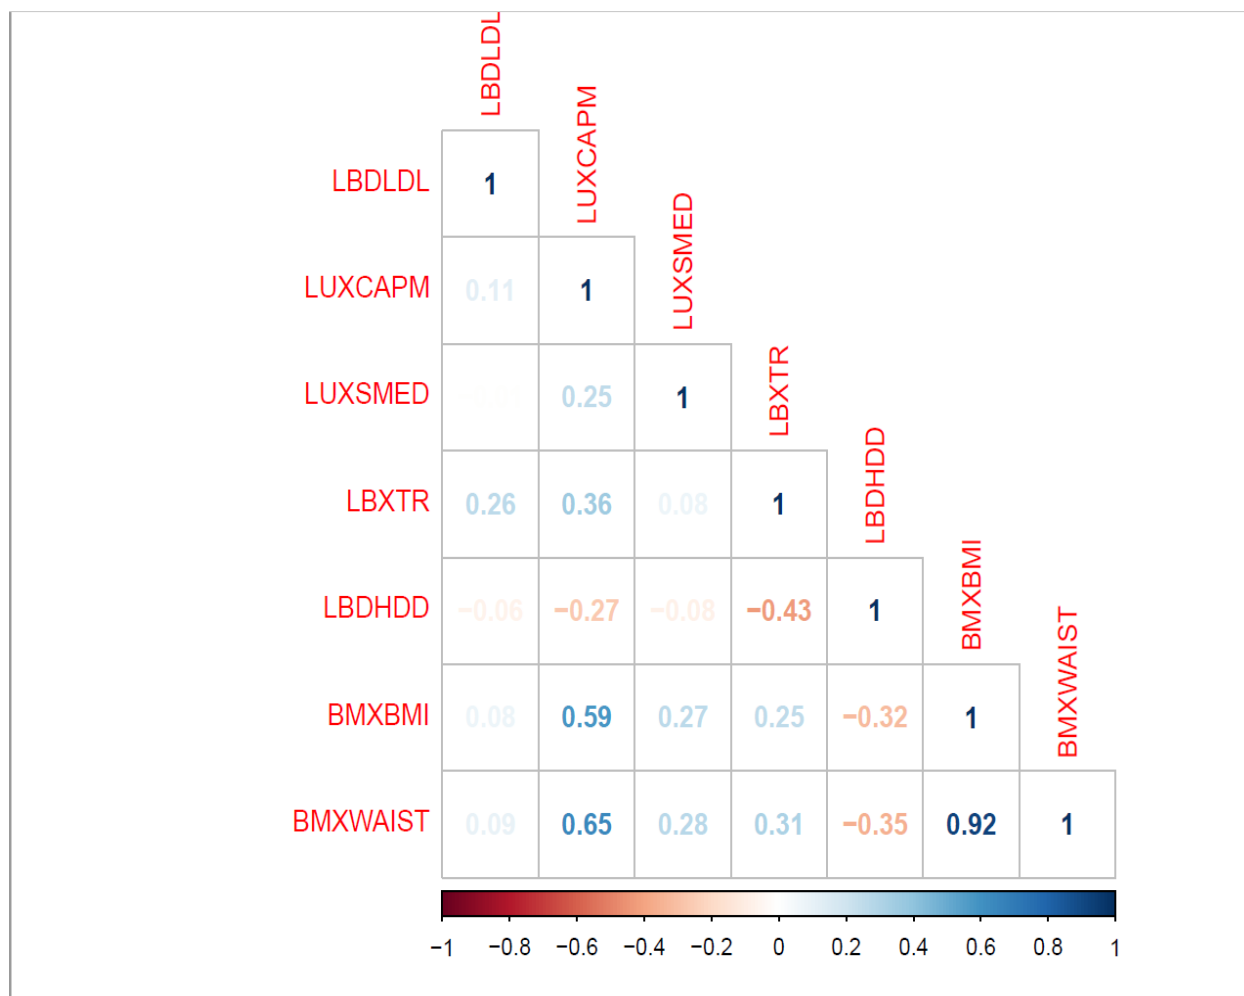

Supplement: f1 [file 1791500.f1.zip]
