# Supplementary material for: Prediction of Liver Steatosis and Fibrosis Based on Clinical Variables Using a Large National Survey Database
Source: Hindawi journal article supplement (doi:10.1155/2023/1791500), 2023-05-24
Supplement: f1 [file 1791500.f1.zip]

| Table 2S: Result of univariable linear regression analysis with CAP as an outcome and fasting hours as predictors using a spline term at 10 hours |          |            |         |          |
|---------------------------------------------------------------------------------------------------------------------------------------------------|----------|------------|---------|----------|
|                                                                                                                                                   | Estimate | Std. Error | t value | Pr(> t ) |
| (Intercept)                                                                                                                                       | 253.59   | 4.224      | 60.037  | <0.01    |
| Fasting                                                                                                                                           | 1.033    | 0.5162     | 2.002   | 0.0684   |
| Fasting spline                                                                                                                                    | -3.810   | 1.6797     | -2.27   | 0.043 *  |
| Fasting: fasting spline                                                                                                                           | 0.0758   | 0.049      | 1.56    | 0.145    |
|                                                                                                                                                   |          |            |         |          |
