# Supplementary material for: Prediction of Liver Steatosis and Fibrosis Based on Clinical Variables Using a Large National Survey Database
Source: Hindawi journal article supplement (doi:10.1155/2023/1791500), 2023-05-24
Supplement: f1 [file 1791500.f1.zip]

Table 5S (A, B, C and D) illustrates the probabilities of having liver steatosis by the CAP using Naïve Bayes Classifier and 294 dB as cutoff. Table A shows the marginal probabilities, table B and C shows the conditional probabilities of having liver steatosis conditional on hemoglobin A1c, body mass index, metabolic energy expenditure per week and serum triglyceride respectively. The accuracy of this classification was 78%.

| Table 5SA: Marginal probabilities of liver steatosis |                        |
|------------------------------------------------------|------------------------|
| Liver steatosis                                      | Marginal probabilities |
| No                                                   | 0.69                   |
| Yes                                                  | 0.32                   |

| Table 5SB: Probabilities of liver steatosis conditional on different categories of hemoglobin A1c |               |         |         |          |
|---------------------------------------------------------------------------------------------------|---------------|---------|---------|----------|
| Liver steatosis                                                                                   | HbA1c 4.1-5.2 | 5.2-5.8 | 5.8-6.4 | 6.4-14.3 |
| No                                                                                                | 0.36          | 0.54    | 0.07    | 0.026    |
| Yes                                                                                               | 0.15          | 0.50    | 0.17    | 0.18     |

| Table 5SC: Probabilities of liver steatosis conditional on different categories of body mass index |                 |           |         |
|----------------------------------------------------------------------------------------------------|-----------------|-----------|---------|
| Liver steatosis                                                                                    | BMI (15.7-23.9) | 23.9-32.5 | 32.5-45 |
| No                                                                                                 | 0.10            | 0.72      | 0.18    |
| Yes                                                                                                | 0.004           | 0.39      | 0.61    |

| Table 5SD: Probabilities of liver steatosis conditional on different categories of metabolic energy expenditure |                                 |           |           |
|-----------------------------------------------------------------------------------------------------------------|---------------------------------|-----------|-----------|
| Liver steatosis                                                                                                 | Metabolic expenditure (40-1680) | 1680-2880 | 2880-5680 |
| No                                                                                                              | 0.40                            | 0.32      | 0.31      |
| Yes                                                                                                             | 0.50                            | 0.24      | 0.26      |

| Table 5SE: Probabilities of liver steatosis conditional on different categories of serum triglyceride level. |                      |                       |                         |
|--------------------------------------------------------------------------------------------------------------|----------------------|-----------------------|-------------------------|
| Liver steatosis                                                                                              | Triglyceride (10-87) | Triglyceride (87-132) | Triglyceride (132-1000) |
| No                                                                                                           | 0.32                 | 0.48                  | 0.20                    |
| Yes                                                                                                          | 0.08                 | 0.50                  | 0.43                    |
