# Supplementary material for: Prediction of Liver Steatosis and Fibrosis Based on Clinical Variables Using a Large National Survey Database
Source: Hindawi journal article supplement (doi:10.1155/2023/1791500), 2023-05-24
Supplement: f1 [file 1791500.f1.zip]

Table 3S: The result of multivariable logistic regression model with liver steatosis as binary outcome using 294 dB/m as cutoff without excluding people with extreme values on predictors.

| Covariate                                | Coefficient | 95%CI       | P-value |
|------------------------------------------|-------------|-------------|---------|
| Intercept                                | 1.07        | 0.955- 1.2  | 0.36    |
| Age                                      | 1.001       | 0.999-1.003 | 0.23    |
| Hemoglobin A1c<br>Reference (3.8-5.2)    |             |             |         |
| Hemoglobin A1c B (5.2-5.8)               | 1.04        | 0.99 -1.11  | 0.27    |
| (5.8-6.3)                                | 1.24        | 1.15 -1.35  | 0.03    |
| (6.3-16.2)                               | 1.45        | 1.31 -1.60  | 0.03    |
| Male                                     |             |             |         |
| Female                                   | 0.92        | 0.89- 0.95  | 0.02    |
| Reference (10-57 mg/dL)                  |             |             |         |
| Triglyceride (57-132 mg/dL)              | 1.11        | 1.05- 1.18  | 0.08    |
| Triglyceride (132-2684 mg/dL)            | 1.206       | 1.11- 1.32  | 0.05    |
| Body Mass Index<br>Reference (12.3-22.1) |             |             |         |
| Body Mass Index (22.1-32.5)              | 1.07        | 1.03- 1.11  | 0.07    |
| Body Mass Index (32.5-86.2)              | 1.518       | 1.44- 1.60  | <0.01   |
| Mets total A (0-1680)                    |             |             |         |
| Mets total B (1680-5760)                 | 0.951       | 0.90- 1.01  | 0.23    |
| Mets total C (5760-561144)               | 0.957       | 0.90- 1.11  | 0.32    |
| Alcohol (1-7)                            |             |             |         |
| (7-10)                                   | 0.995       | 0.93- 1.07  | 0.90    |
| (10-11)                                  | 0.95        | 0.91- 0.99  | 0.13    |
