# Supplementary material for: Prediction of Liver Steatosis and Fibrosis Based on Clinical Variables Using a Large National Survey Database
Source: Hindawi journal article supplement (doi:10.1155/2023/1791500), 2023-05-24
Supplement: f1 [file 1791500.f1.zip]

Table 4S: Result of adaptive Lasso regression analysis with liver steatosis as an outcome using 294 CAP as cutoff. Coefficients for serum LDL, systolic, diastolic blood pressure and smoking were shrunk to zero indicating their weak association with liver steatosis.

|                                       |       |
|---------------------------------------|-------|
|                                       | s0    |
| (Intercept)                           | 41.1  |
| LDL                                   | .     |
| Serum Triglyceride level              | 0.12  |
| Age                                   | 0.49  |
| Gender                                | -15   |
| Metabolic energy consumption per week | -1.26 |
| Body mass index                       | 4.5   |
| Serum Alcohol level                   | -0.6  |
| Hemoglobin A1c                        | 4.5   |
| Systolic blood pressure               | .     |
| Diastolic blood pressure              | .     |
| Smoking                               | .     |
