# Supplementary material for: Prediction of Liver Steatosis and Fibrosis Based on Clinical Variables Using a Large National Survey Database
Source: Hindawi journal article supplement (doi:10.1155/2023/1791500), 2023-05-24
Supplement: f1 [file 1791500.f1.zip]

Table 7S: Results of linear regression model with liver stiffness values as an outcome and the following covariates as predictors: Age, Sex, hemoglobin A1c, HDL, body mass index, platelet count, systolic blood pressure and AST/ALT ratio. \* Predictors are centralized at their means.

|                                                   | Estimate | St. Error | P-value |
|---------------------------------------------------|----------|-----------|---------|
| Intercept                                         | 6.04     | 0.32      | <0.01   |
| Age*                                              | 0.003    | 0.005     | 0.6     |
| Sex                                               | -0.8     | 0.22      | 0.01    |
| Hemoglobin A1c*                                   | 0.4      | 0.07      | 0.001   |
| HDL<50 mg/dL<br>(Reference; HDL≥50 mg/dL)         | 0.37     | 0.12      | 0.02    |
| Body mass index*                                  | 0.24     | 0.02      | <0.001  |
| Platelet<125<br>(Reference; platelet counts ≥125) | 11       | 4.5       | 0.05    |
| Diastolic blood pressure*                         | -0.02    | 0.007     | 0.05    |
| AST/ALT ratio *                                   | 1.03     | 0.37      | 0.027   |
