# Supplementary figures and images for: Prediction of Liver Steatosis and Fibrosis Based on Clinical Variables Using a Large National Survey Database
Source: Hindawi journal article supplement (doi:10.1155/2023/1791500), 2023-05-24

Syst=Systolic blood pressure. Diast=Diastolic blood pressure

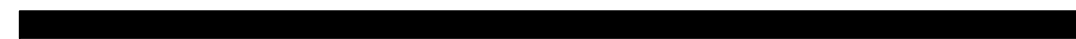

Supplement: f1 [file 1791500.f1.zip]

Figure 8S: Loess smoother between serum HDL and liver stiffness values.

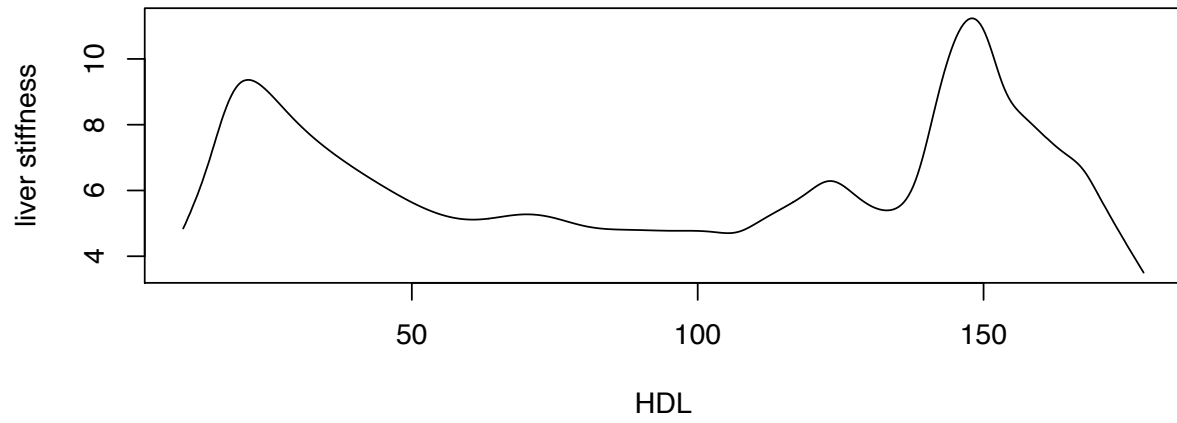

Supplement: f1 [file 1791500.f1.zip]

Figure 10S: loess smoother between Body mass index and liver stiffness values

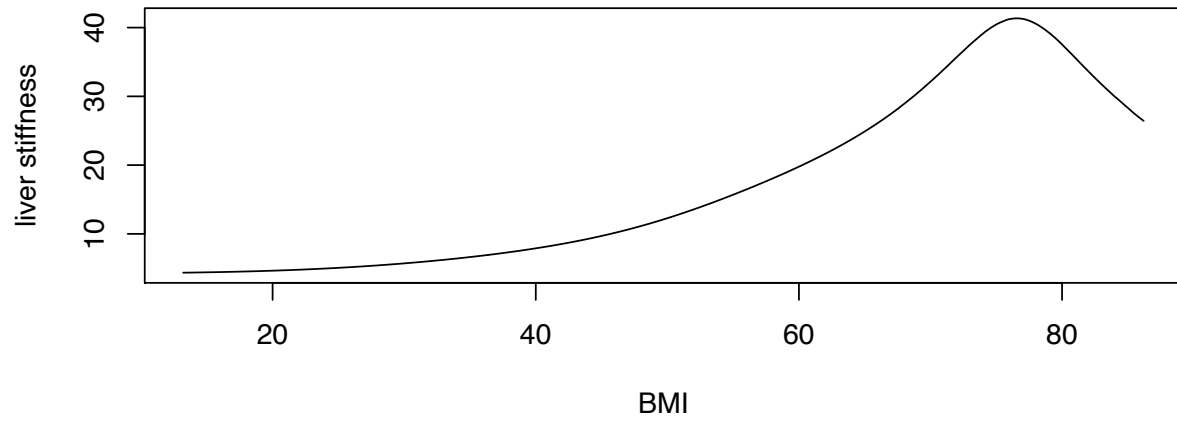

Supplement: f1 [file 1791500.f1.zip]

Figure 9S: loess smoother between hemoglobin A1c and liver stiffness values

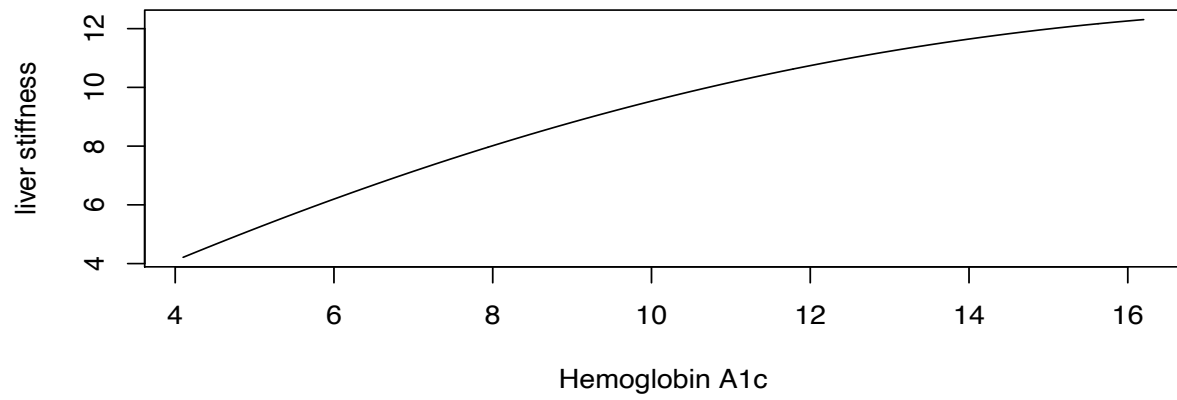

Supplement: f1 [file 1791500.f1.zip]

Figure 11S: loess smoother between age and liver stiffness values

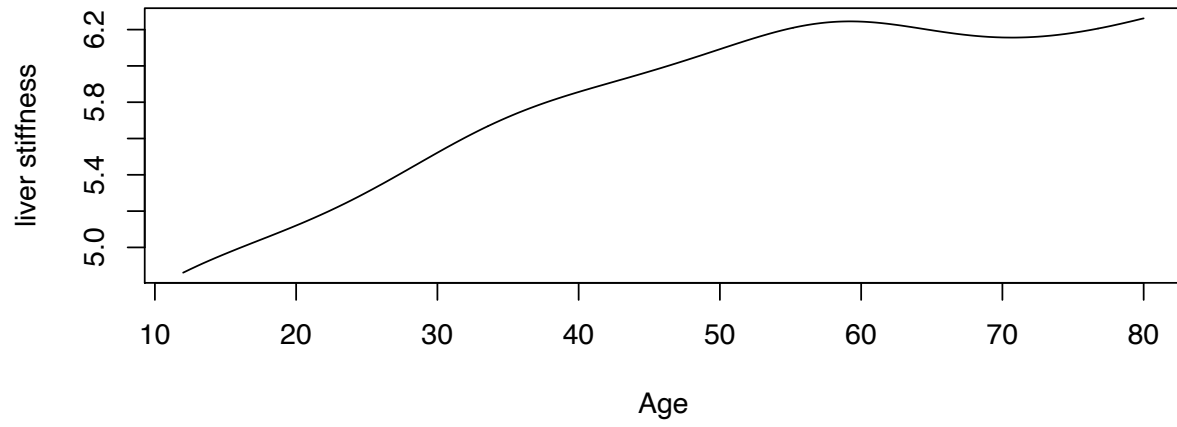

Supplement: f1 [file 1791500.f1.zip]
